CORRECTION

# Correction: Rapid Losses of Surface Elevation following Tree Girdling and Cutting in Tropical Mangroves

The *PLOS ONE* Staff

There is an error in affiliation 7 for author Maurizio Mencuccini. Affiliation 7 should be: ICERA at Centre for Ecological Research and Forestry Applications, Universitat Autònoma de Barcelona, Barcelona Spain.

## Reference

1. Lang'at JKS, Kairo JG, Mencuccini M, Bouillon S, Skov MW, Waldron S, et al. (2014) Rapid Losses of Surface Elevation following Tree Girdling and Cutting in Tropical Mangroves. *PLoS ONE* 9(9): e107868. doi: [10.1371/journal.pone.0107868](https://doi.org/10.1371/journal.pone.0107868) PMID: [25244646](https://pubmed.ncbi.nlm.nih.gov/25244646/)

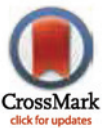

## OPEN ACCESS

**Citation:** The *PLOS ONE* Staff (2015) Correction: Rapid Losses of Surface Elevation following Tree Girdling and Cutting in Tropical Mangroves. *PLoS ONE* 10(3): e0118334. doi:10.1371/journal.pone.0118334

**Published:** March 18, 2015

**Copyright:** © 2015 The PLOS ONE Staff. This is an open access article distributed under the terms of the [Creative Commons Attribution License](https://creativecommons.org/licenses/by/4.0/), which permits unrestricted use, distribution, and reproduction in any medium, provided the original author and source are credited.
